1 **Examination of the contribution of Nav1.7 to axonal propagation in**  
2 **nociceptors**

3

4 George Goodwin<sup>1</sup>, Sheridan McMurray<sup>2</sup>, Edward B Stevens<sup>3</sup>, Franziska Denk<sup>1</sup> & Stephen B  
5 McMahon<sup>1</sup>

6 <sup>1</sup>Neurorestoration Group, Wolfson Centre for Age-Related Diseases, King's College London,  
7 SE1 1UL, UK

8 <sup>2</sup>Galvani Bioelectronics, Stevenage, SG1 2NY, UK

9 <sup>3</sup>Lixion Ltd, Cambridge, CB22 5LD, UK

10 EBS was a consultant for MundiPharma

11

12 Corresponding author:

13 Dr George Goodwin

14 [george.l.goodwin@kcl.ac.uk](mailto:george.l.goodwin@kcl.ac.uk)

15 Neurorestoration group

16 Wolfson Centre for Age-Related Diseases,

17 King's College London

18 London SE1 1U

19

## 20 **Abstract**

21 Nav1.7 is a promising drug target for the treatment of pain because individuals with Nav1.7 loss-of-  
22 function mutations are insensitive to pain and do not have other serious neurological deficits.  
23 However, current peripherally restricted Nav1.7 inhibitors have not performed well in clinical pain  
24 trials, which may reflect a lack of understanding of the function of Nav1.7 in the transmission of  
25 nociceptive information. Although numerous studies have reported that Nav1.7 has a moderate role  
26 in peripheral transduction, the precise contribution of Nav1.7 to axonal propagation in nociceptors is  
27 not clearly defined, particularly for afferents innervating deep structures.

28 In this study, we examined the contribution of Nav1.7 to axonal propagation in nociceptors utilising  
29 sodium channel blockers in *in vivo* electrophysiological and calcium imaging recordings from L4 in  
30 the mouse. Using the sodium channel blocker TTX (1-10 $\mu$ M) to inhibit Nav1.7 and other TTX-S  
31 sodium channels along the sciatic nerve, we first showed that around 2/3<sup>rds</sup> of nociceptive neurons  
32 innervating the skin, but a lower proportion innervating the muscle (45%), are blocked by TTX. In  
33 contrast, nearly all large-sized A-fibre cutaneous afferents (95-100%) were blocked by axonal TTX.  
34 Characterisation of TTX resistant cutaneous nociceptors revealed that many were polymodal (57%)  
35 and capsaicin sensitive (57%).

36 Next, we examined the role of Nav1.7 in axonal propagation in nociceptive neurons by applying the  
37 selective channel blocker PF-05198007 (300nM-1 $\mu$ M) to the sciatic nerve between stimulating and  
38 recording sites. 100-300nM PF-05198007 blocked propagation in 63% of C-fibre sensory neurons,  
39 whereas similar concentrations did not affect propagation in rapidly conducting A-fibre neurons. We  
40 conclude that Nav1.7 has an essential contribution to axonal propagation in only around 2/3<sup>rds</sup> of  
41 nociceptive C-fibre neurons, and a lower proportion ( $\leq$ 45%) of nociceptive neurons innervating  
42 muscle.

## 43 **Introduction**

44 Non-selective pharmacological blockade of voltage gated sodium channels (Navs) with local  
45 anaesthetics, such as lidocaine, at the peripheral or central component of sensory neurons is  
46 effective in preventing the transmission of sensory input to the central nervous system (CNS) [15;  
47 23]. In minor surgical procedures, complete pain-relief can be achieved in individuals by injecting  
48 local anaesthetics around the appropriate peripheral nerve fibres, and even in extreme pathological  
49 conditions, such as neuropathic pain caused by trauma or diabetes, similar results can be achieved  
50 [19; 48]. However, as Navs are widely expressed throughout the peripheral and central nervous  
51 systems [55], and are essential for electrical signalling in other tissue types, such as cardiac tissue

52 [36], the use of local anaesthetics outside of topical application (e.g. Lidoderm patches in  
53 postherpetic neuralgia [16]) and acute nerve block for pain relief is limited.

54 There are 9 different Nav alpha subtypes (Nav1.1-1.9), five of which are expressed in adult  
55 mammalian sensory neurons: the tetrodotoxin sensitive (TTX-S) subtypes Nav1.1, Nav1.6, Nav1.7  
56 and the TTX resistant (TTX-R) subtypes Nav1.9 and Nav1.9 [55]. Nav1.1 and Nav1.6 are  
57 predominantly expressed in large sized myelinated A-fibre neurons, which principally encode non-  
58 nociceptive information, whereas Nav1.7-Nav1.9 are highly expressed in small unmyelinated C-fibre  
59 neurons [55], which are nearly all classed as nociceptors [13]. In theory, selective inhibition of the  
60 nociceptive sodium channel subtypes should be effective in providing analgesia in the absence of  
61 extensive side-effects because their expression is mostly restricted to DRG neurons [55]. Nav1.7 is  
62 the most promising nociceptive subtype to target with an inhibitor because individuals with Nav1.7  
63 loss-of-function mutations are insensitive to somatic and visceral pain [9; 17]. Additionally, affected  
64 individuals do not suffer from other sensory abnormalities (except anosmia) [51], and therefore  
65 Nav1.7 inhibition might not be expected to produce serious side effects. Considering these findings  
66 and observations, it is unsurprising that numerous Nav1.7 blockers are being developed as  
67 analgesics. However, many of the small molecule inhibitors developed to date have not been further  
68 progressed for the treatment of pain due to lack of efficacy in clinical trials [25].

69 Most of the Nav1.7 blockers that have failed in the clinic are peripherally restricted (poorly  
70 penetrate the blood brain barrier (BBB)) which reduces the likelihood of off-target inhibition of  
71 sodium channels in the brain. This means that peripherally restricted Nav1.7 inhibitors are only  
72 capable of targeting channels located in the periphery, i.e. the peripheral terminals, axons or DRG,  
73 and not the central terminals within the spinal cord, which are physically located across the blood-  
74 spinal cord barrier. At the peripheral terminals of cutaneous afferents, pharmacological inhibition of  
75 Nav1.7 reduces, but does not abolish, responses to noxious stimuli in around 2/3<sup>rds</sup> of nociceptors  
76 [20; 29], whereas inhibition at visceral afferent terminals is not reported to affect responses to  
77 noxious stimulation [14; 20]. The consequences of Nav1.7 inhibition along peripheral axons are less  
78 well defined because studies examining the role of the channel in axonal propagation are limited  
79 due to the lack of selective blockers. Moreover, the available aryl sulphonamide Nav1.7 blockers are  
80 only selective in certain species [1]. A previous pharmacological study in the rat reported that Nav1.7  
81 is essential for propagation in all C-fibre neurons [41]. However, this is in contrast to numerous  
82 studies reporting that propagation in a proportion (75-96%) of C-fibres is maintained when Nav1.7  
83 (and other TTX-S channels) are blocked following axonal TTX application [24; 27; 37; 45; 52]. Studies  
84 employing genetic knockdown of Nav1.7 also report that a proportion of C-fibres are capable of  
85 propagation without the channel [21; 33].

86 To determine the proportion of nociceptive neurons dependent on Nav1.7 for axonal propagation,  
87 we used in vivo electrophysiology and calcium imaging to measure evoked activity before and after  
88 application of Nav blockers to peripheral nerve between stimulating and recording sites. Initially, we  
89 sought to quantify the proportion of the nociceptive afferents innervating cutaneous and deep  
90 structures that are dependent on TTX-S Navs for axonal propagation. Topical application of TTX  
91 between stimulating and recording sites revealed a difference in the proportion of nociceptive  
92 neurons dependent on TTX-S for propagation between skin and muscle innervating afferents.  
93 Further experiments utilising a Nav1.7 selective blocker revealed that Nav1.7 is the major TTX-S  
94 channel that is essential for axonal propagation in sensory C-fibre afferents.

## 95 **Materials and Methods**

### 96 **Animals**

97 Adult C57BL/6J mice (n = 30; Charles River, UK) weighing 24-30 g were used for in vivo imaging experiments.  
98 Adult male CD1 mice (n = 23; Charles River, UK) weighing 30-45 g were used for electrophysiological  
99 experiments. Mice were housed on a 12/12 h light/dark cycle with a maximum of 5 mice per cage, with  
100 food and water available *ad libitum*. All experiments were performed in accordance with the United  
101 Kingdom Home Office Animals (Scientific Procedures) Act (1986).

### 102 **Administration of AAV9-GCaMP6s**

103 We utilised the genetically encoded calcium Indicator GCaMP6s for imaging sensory neuron activity  
104 [7]. GCaMP6s was delivered to sensory neurons via a adeno-associated viral (AAV) vector, which was  
105 administered to mice pups at P3-P6 as previously described [50]. Briefly, groups of 3-4 mice were  
106 separated from their mother and anaesthetised with 0.5-1% Isoflurane. 5  $\mu$ l of virus  
107 AAV9.CAG.GCaMP6s.WPRE.SV40 (Addgene, USA) was injected intraplantar into the left hind paw  
108 using a 10 $\mu$ l Hamilton syringe with a 34G needle attached. In experiments examining axonal  
109 propagation in muscle afferents the virus was injected subcutaneously in the nape of neck. Following  
110 the injection, pups were maintained on a heating pad until they woke up and were then returned to  
111 their mother. Mice were separated from their mother after weaning and then were used for in vivo  
112 imaging from 7-8 weeks after the injection.

### 113 **In vivo imaging of sensory neuron activity using GCaMP**

114 Mice were anesthetized using a combination of 1-1.25 g/kg 12.5% w/v urethane administered  
115 intraperitoneally in addition to 0.5-1.5% isoflurane delivered via a nose cone. Body temperature was  
116 maintained close to 37°C using a homeothermic heating mat with a rectal probe (FHC). An incision  
117 was made in the skin on the back and the muscle overlying the L3, L4, and L5 DRG was removed.  
118 Using fine-tipped rongeurs the bone surrounding the L4 DRG was carefully removed in a caudal-

119 rostral direction. Bleeding was prevented using gelfoam (Spongostan™; Ferrosan, Denmark) or bone  
120 wax (Lukens). The DRG was washed and kept moist using 0.9% saline. The position of the mouse was  
121 varied between prone and lateral recumbent to orient the DRG in a more horizontal plane. The  
122 exposure was then stabilized at the neighbouring vertebrae using spinal clamps (Precision Systems  
123 and Instrumentation) attached to a custom-made imaging stage. The DRG were covered with  
124 silicone elastomer (World Precision Instruments, Ltd) to maintain a physiological environment. Prior  
125 to imaging, animals received a subcutaneous injection of 0.25-ml sterile normal saline (0.9%) to keep  
126 them hydrated. The mouse was then placed under the Eclipse Ni-E FN upright confocal/multiphoton  
127 microscope (Nikon) and the microscope stage was diagonally orientated to optimise focus on the  
128 DRG. The ambient temperature during imaging was kept at 32°C throughout. All images were  
129 acquired using a 10× dry objective. A 488-nm Argon ion laser line was used to excite GCaMP6s and  
130 the signal was collected at 500–550 nm. Time lapse recordings were taken with an in-plane  
131 resolution of 512 × 512 pixels and a fully open pinhole for confocal image acquisition. All recordings  
132 were acquired at 3.65 Hz. In some experiments, the skin was removed from the gastrocnemius  
133 muscle. The exposed muscle belly was covered in gauze-soaked KREBS to prevent it from drying out.

#### 134 **Electrical stimulation of the peripheral terminals**

135 In imaging experiments, the stimulating electrodes used consisted of an anode that was comprised  
136 of 6 x 30G needles soldered to a single piece of wire and a cathode that was a single 30G needle. The  
137 6 x 30G needles were inserted transcutaneously into the dorsal surface of the hind paw, while the  
138 other needle was inserted into the skin at base of the ankle. A stimulator was used to deliver square  
139 wave current pulses of 15mA and 15mS to activate the terminals of both A- and C-fibre neurons. 12  
140 pulses (3Hz, 4s) were delivered at baseline and periodically post-drug application to assess axonal  
141 propagation. In electrophysiological experiments, the peripheral terminals were stimulated with a  
142 constant current stimulator (Digitimer, UK) connected to two stimulating pins inserted  
143 transcutaneously into the dorsal hind paw. Square wave pulses of up to 450us, 450 mA were used to  
144 recruit A-fibre neurons and pulses of up to 1ms, 2mA were used for C-fibres. For all experiments  
145 involving electrical stimulation, 0.1Hz stimulation was applied throughout the recording to facilitate  
146 PF007 binding [1].

#### 147 **Thermal stimulation of the peripheral terminals**

148 A Peltier device (TSAll, Medoc) with a 16 x 16 mm probe was carefully placed onto the plantar  
149 surface of the hind paw ipsilateral to the DRG being imaged and was maintained in position using a  
150 V-clamp. The temperature of the block was increased from a baseline temperature of 32°C to 50°C  
151 at a rate of 8 °C/s and maintained for 2 seconds before returning to 32°C at the same rate. For cold

152 stimulation, the temperature of the Peltier was decreased to 0°C at a rate of 4 °C/s and maintained  
153 for 2 seconds before returning to 32°C.

#### 154 **Mechanical or chemical stimulation of the peripheral terminals**

155 Mechanically sensitive afferents were identified by 1) pinching using a pair of serrated forceps, 2)  
156 brushing using a cotton bud or, 3) flexion and extension of the leg. At the end of some pharmacology  
157 experiments capsaicin cream (10%) was gently applied to the plantar surface of the hind paw using a  
158 cotton bud.

#### 159 **Calcium imaging data analysis**

160 The image analysis pipeline Suite2P: (<https://github.com/MouseLand/suite2p>) [35] was utilised for  
161 motion correction, automatic ROI detection and signal extraction. Further analysis was undertaken  
162 with a combination of Microsoft Office Excel 2013, Matlab (2018a) and RStudio (Version 4.02). A  
163 proportion (0.4) of the neuropil (the local background of each cell) was subtracted from the  
164 fluorescent signal for each corresponding cell. To generate normalised data, a baseline period of  
165 fluorescence was recorded for each ROI and changes from this baseline fluorescence were  
166 calculated as  $\Delta F/F$  and expressed as a percentage [8]. Cells were grouped into small to medium  
167 ( $\leq 750\mu\text{m}^2$ ) and Large ( $>750\mu\text{m}^2$ ) sized neurons. A limitation of this technique is the accurate  
168 determination of cell sizes. As we are imaging with the pinhole fully open across multiple planes,  
169 cells that are located deeper in the tissue can appear larger due to dispersion of the fluorescence.  
170 i.e. small cells located deeper in the tissue may appear medium sized. Therefore, we did not split the  
171 size groups further into small and medium sized cells. For experiments examining axonal  
172 propagation in neurons innervating the hind paw, neurons were tested for responses to heat, cold  
173 and mechanical (pinch) stimuli (in that order). Stringent criteria were used for positive responses to  
174 thermal and mechanical stimulation of the terminals. A positive response was taken if the average  
175 signal during stimulation was 70% plus 4 SD above the relative baseline fluorescence i.e. the average  
176 level of fluorescence immediately prior to the stimulation. For electrical stimulation, a positive  
177 response was taken if the average signal during stimulation was at least 50% plus 2 SD above the  
178 relative baseline. A neuron was classed as not conducting through the treatment site when the  
179 average fluorescent signal fell below this threshold. In most instances, traces of non-conducting  
180 neurons were double checked by examining raw  $\text{Ca}^{2+}$  traces. A positive response to capsaicin was  
181 taken if the average fluorescence signal during the 5-minute post-capsaicin period was 50% plus 2  
182 SD greater than the 2-minute baseline period. For experiments examining axonal propagation in  
183 muscle afferents, only small to medium sized neurons responding at baseline to just muscle pinch  
184 (denoted pinch only) and neurons responding to just hind paw brush (denoted brush only) that were

185 blocked by lidocaine at the end of the experiment were analysed. To facilitate drug block, neurons  
186 were activated periodically by brush and pinch stimulation throughout the experiment (See Fig 2A).  
187 At the end of each drug application period, the stimulation procedure was performed twice to  
188 reduce likelihood of missing receptive fields activated at baseline.

### 189 **In vivo electrophysiology**

190 *In vivo* single-unit electrophysiological recordings from A- or C- fibre axons in the L4 dorsal root were  
191 carried out in CD1 mice (n = 23), as previously described in the rat [3; 18]. Animals were anaesthetised  
192 using a combination of 1-1.25 g/kg 12.5% w/v urethane intraperitoneally in addition to 0.5-1.5%  
193 isoflurane delivered via a nose cone. The body temperature was maintained at 37°C using a rectal  
194 thermistor probe connected to a heated pad (Harvard Apparatus, Kent, United Kingdom). A lumbar  
195 laminectomy was performed from L2 to L5 to expose the spinal canal. The surrounding skin was  
196 sutured to a metal ring to form a pool filled with warmed mineral oil. The dura mater was opened  
197 and the left L4 dorsal root was cut close to the spinal cord. The cut end of the dorsal root was placed  
198 onto a glass platform (4 × 2.5 mm).

199 Fine filaments were teased from the cut end of the dorsal root using finely sharpened forceps and  
200 individually placed onto paired gold recording electrodes. Extracellular potentials were band-passed  
201 filtered (10-5,000 Hz) and amplified (1k) and digitised using Spike 2 software (Cambridge Electronic  
202 Designs, Cambridge, United Kingdom). Mechanical receptive fields were searched for and once a  
203 field had been identified, needle electrodes were inserted into the skin at the receptive field  
204 location. Electrical stimulation was applied as described above, and the number of fibres on each  
205 filament was determined by slowly increasing the stimulus amplitude until the maximum number of  
206 waveforms was elicited. To prevent a single electrical stimulus causing >1 action potential to be  
207 produced from the same neuron, a cut-off amplitude of 450uA was used for A-fibres and 2mA for C-  
208 fibres. Only clearly identifiable waveforms were studied (<8 fibre waveforms per filament). Neurons  
209 were classified based on waveform shape and conduction velocity, which was determined from the  
210 conduction distance and latency of individual waveforms. Conduction velocities above 16m/s were  
211 considered A $\alpha$ / $\beta$ -fibres, and below 1.2 m/s were considered C-fibres [56]. Neurons conducting in the  
212 A $\delta$ -fibre were identified in some experiments, but we preferentially searched for C-fibres because  
213 our primary aim was to compare the effects of Nav1.7 in this population. Once a small (2-7) group of  
214 A- or C-fibre neurons with conduction velocities that were stable had been identified, the terminal  
215 was stimulated at 0.1Hz and drugs were applied topically to the sciatic nerve. Neurons were  
216 considered to not be conducting through the treatment site when they failed to produce an action  
217 potential following 6 consecutive electrical stimulations, or, if at the end of the experiment, no  
218 longer responded to mechanical stimulation of the receptive field.

## 219 ***In vivo* topical drug application**

220 The sciatic nerve was exposed at the level of the mid thigh and was freed from surrounding  
221 connective tissue. A 2-3 mm portion of the nerve, located 1-2mm proximal to the trifurcation, was  
222 carefully desheathed using the tip of a 30G insulin needle. To isolate the desheathed portion from  
223 the surrounding tissue, the nerve was covered in 4% agar (MP Biomedicals) dissolved in 0.9% saline.  
224 Once it had set, a well (~vol 25-30 $\mu$ L) was cut out around the desheathed portion and was filled with  
225 warmed (37°C) Krebs solution. All drugs were warmed (37°C) before application, and the well was  
226 periodically replaced with fresh drug solution throughout recordings. Each drug concentration was  
227 applied sequentially for a duration of 20-30 minutes.

## 228 **Drugs and Chemicals**

229 All drugs were dissolved to make stock solutions and then frozen at -20°C until their day of use. TTX  
230 (Acros Organics, Fisher Scientific) and 4,9-Anhydrotetrodotoxin (Tocris, UK) were dissolved to 1mM  
231 in 0.2 mM citric acid (pH 4.8). PF-05198007 (a gift from Dr S McMurray [1]), was dissolved in DMSO  
232 to 10mM. Lidocaine hydrochloride (Sigma, UK) was dissolved in 0.9% w/v sodium chloride to a  
233 concentration of 74mM (2% w/v). Drugs were diluted down to their final concentrations in either  
234 freshly carbogenated (95% O<sub>2</sub> 5% CO<sub>2</sub>) Krebs solution (In mM: NaCl, 118; KCl, 4.7; NaHCO<sub>3</sub>, 25;  
235 KH<sub>2</sub>PO<sub>4</sub>, 1.2; MgSO<sub>4</sub>, 1.2; glucose, 11; and CaCl<sub>2</sub>, 2.5) adjusted to pH 7.4.

## 236 **Quantification and Statistical analysis**

237 Graphing and statistical analysis was undertaken with a combination of Microsoft Office Excel 2013  
238 and GraphPad Prism (Version 8). All data sets were checked for normality using Kolmogorov-Smirnov  
239 tests. Details of statistical tests and sample sizes are recorded in the appropriate figure legends.  
240 Main effects from ANOVAs are expressed as an F-statistic and P-value within brackets. All data  
241 plotted represent mean  $\pm$  SEM. Statistical differences between groups in *in vivo* imaging experiments  
242 involving different drug groups, neuron sizes and doses were compared using a 3-way repeated  
243 measures analysis of variance (ANOVA) with Sidak's post hoc comparisons. For imaging experiments  
244 comparing drug effects on propagation in heat responsive nociceptors, statistical differences were  
245 determined using a 2-way repeated measures ANOVA with Sidak's post hoc comparisons. For  
246 imaging experiments involving muscle afferents, statistical differences between groups were  
247 determined using a 2-way ANOVA with Tukey's post hoc comparison. The proportion of neurons  
248 blocked by TTX in different stimuli response groups was compared using Chi-squared test. For  
249 analysis of the *in vivo* electrophysiology data, conduction velocities were compared between models  
250 using Kruskal-Wallis tests and the proportion of neurons blocked between drug groups was  
251 compared using Fishers exact test.



## 252 Results

### 253 Axonal TTX application has differential effects on propagation depending on fibre type and 254 innervation territory

255 Electrical stimulation of the plantar surface of the hind paw activated neurons of all sizes  
256 (small/medium neurons mean 71 (SEM 8.7) and large mean 22 (SEM 2.3); n = 11 animals; Fig 1A –  
257 second panel). The total number of neurons recruited via electrical stimulation varied between  
258 experiments (range of 58-157) and therefore the proportion of neurons responding to electrical  
259 stimulation at each time point was averaged between animals. In a significant number of neurons,  
260 TTX applied to the sciatic nerve between stimulating and recording sites blocked propagation; main  
261 effect of TTX:  $F(1, 7) = 339.6, P < 0.0001$ ; 3-Way ANOVA. Main effects of dose ( $F(1, 7) = 8.58, P < 0.05$ )  
262 and neuron size ( $F(1, 7) = 14.40, P < 0.01$ ) were also statistically significant, as were several  
263 interactions, including between neuron size x TTX ( $F(1, 7) = 24.84, P < 0.01$ ) – a result in line with  
264 expectations, as TTX should preferentially block large sized neurons. Thus, 1 $\mu$ M TTX blocked 61.4%  
265 (SEM 6.3) small to medium and 90.9% (SEM 4.2) large sized neurons, which was significantly  
266 different to that of the control for each corresponding size group (mean block = 10.9%, SEM 1.8 and  
267 3.0%, SEM 2.9;  $p < 0.01$  &  $p < 0.0001$  Sidak's post-hoc comparisons test for small to medium and large  
268 sized neurons respectively; n = 4-5 mice group; Fig 1A- left & middle panels & 1B). Subsequent  
269 application of 10  $\mu$ M TTX produced a small and non-significant increase in the number of axons  
270 blocked (average of 71.0% (SEM 3.9) and 94.5% (SEM 1.9);  $p = 0.41$  and  $p = 0.85$  Sidak's post-hoc  
271 comparisons compared to 1  $\mu$ M TTX for small to medium and large sized neurons respectively; Fig  
272 1A - middle panel & 1B).

273 Not all small to medium sized DRG neurons are nociceptors and therefore we examined the effects  
274 of TTX on propagation only in the neurons that responded to noxious heat stimulation at the  
275 beginning of the experiment. TTX blocked propagation in a significant number of heat sensitive  
276 nociceptors; main effect of TTX:  $F(1, 5) [\text{Drug}] = 84.69, P < 0.001$ ; Repeated measures 2-Way ANOVA.  
277 There was also a small but significant interaction between Dose x Drug group ( $F(1, 5) = 15.93,$   
278  $P < 0.05$ ). The average number of heat sensitive nociceptors blocked by TTX was 55.6% (SEM 5.6) at a  
279 concentration of 1  $\mu$ M and 66.3% (SEM 4.2) at 10  $\mu$ M, which were both significantly different to  
280 their corresponding time-matched controls (mean block = 9.1% , SEM 3.2 and 10.2%, SEM 2.4  
281 following vehicle 1 & 2 respectively; both  $p < 0.0001$  Sidak's post-hoc comparisons; n = 3-4 mice; Fig 1  
282 C). The proportion of neurons not blocked by TTX were blocked by subsequent application of 1mM  
283 lidocaine/ 1 $\mu$ M TTX to the sciatic nerve (100% block for all groups; n = 102-131 small to medium and  
284 25-51 large neurons averaged from n = 2 mice; Fig 1A – experiments denoted by red dots in right  
285 panel, 1B & C).

286 The proportion of nociceptive neurons innervating muscle afferents sensitive to axonal TTX  
287 application was examined (See Fig 2A for experimental design). Presumptive muscle afferent  
288 nociceptors were identified as small to medium sized neurons responding at baseline only to strong  
289 muscle pinch, but not leg movement or hind paw brush (eliminating low threshold proprioceptive  
290 and tactile afferents). TTX block in the presumptive muscle nociceptors was compared to non-  
291 nociceptive large sized neurons that only responded to hind paw brush. The total number of neurons  
292 activated varied between experiments (6-28 neurons activated by brush only, 12-30 neurons  
293 activated by pinch only) and therefore the proportion of baseline responding neurons also  
294 responding at each timepoint was averaged between animals. 1  $\mu$ M TTX caused a significant block of  
295 propagation in both brush and pinch responsive groups (F [Drug] (1, 10) = 191.2  $P < 0.0001$ ; 2-way  
296 ANOVA). There were also significant main effects between brush and pinch groups (F (1, 10) = 26.34  
297  $P < 0.001$ ; 2-way ANOVA) and the interaction between drug and stimuli groups (F (1, 10) = 47.7,  
298  $P < 0.0001$ ). 1 $\mu$ M TTX blocked 100% of brush afferents and 46.2% (SEM 6.0) pinch afferents, which  
299 was significantly different to that of the control for each corresponding group (mean block = 7.4%,  
300 SEM 3.7 and 15.3%, SEM 9.4;  $n = 3-4$  mice/group;  $p < 0.0001$  &  $p < 0.01$  Tukey post hoc comparison for  
301 brush and pinch afferents respectively; Fig 2 B-F, Movie 1).

302 **Tetrodotoxin resistant neurons innervating the hind paw are comprised of capsaicin sensitive**  
303 **polymodal nociceptors**

304 Responses to heat, cold and mechanical stimuli were assessed prior to electrical stimulation in most  
305 topical drug experiments and neurons were grouped according to their responses to different stimuli  
306 (Fig 3A for summary of TTX experiments). The level of polymodality within a neuronal population  
307 was assessed by determining the number of thermally responsive neurons also responding to  
308 mechanical stimulation and the number of mechanically sensitive neurons also responding to  
309 thermal stimulation (Supplementary table 1). Most temperature sensitive neurons also responded to  
310 mechanical stimulation (67.1%, SEM 3.4 and 73.9%, SEM 3.5 for heat and cold groups respectively,  
311 average from n = 13 mice; Supplementary Fig 1A). In contrast, a lower proportion of mechanically  
312 sensitive neurons also responded to heat stimulation (mean = 32.4%, SEM 3.3) and very few also  
313 responded to cold stimulation (mean = 5.2%, SEM 0.5; Supplementary Fig 1B). Levels of polymodality  
314 were increased when assessed in neurons that responded to electrical stimulation (Supplementary  
315 table 1).

316 The small to medium sized population not blocked by 1 $\mu$ M axonal TTX application contained a higher  
317 proportion of polymodal neurons (56.8%, 75/132 responsive neurons) compared to the population  
318 blocked by TTX (37.4%, 128/342 responsive neurons;  $p < 0.001$ , Chi-square test with Yates'  
319 correction). The polymodal mechano-heat (M-H) group contained the highest proportion (40.1%,  
320 71/177) of neurons that were not blocked by axonal TTX application, whereas the proportion of  
321 mechano-cold (M-C) polymodal neurons was lower (20%, 2/10), but not significantly different ( $p =$   
322 0.35 vs M-H group, Chi-square test with Yates' correction; Fig 3B). All the polymodal heat-cold  
323 neurons (6/6) were blocked by axonal TTX application. The proportion of unimodal neurons  
324 responding to heat not blocked by axonal TTX was 37.8% (14/37), which was significantly different  
325 compared to neurons responding to just mechanical (18.4%, 43/234;  $p < 0.05$ , Chi-square test with  
326 Yates' correction; n = 6 mice). As nearly all large sized neurons were blocked by axonal TTX, no  
327 comparisons were made within this population. To determine how many TTX-R neurons were TRPV1  
328 positive, 10% capsaicin cream was applied to the corresponding area of the hind paw at the end of  
329 the experiment. Application of capsaicin to the hind paw after 1-10  $\mu$ M TTX application to the nerve  
330 caused a positive response in 56.9% (SEM 3.7 ; n = 3 mice; Fig 4C & D, Movie 2) of neurons that were  
331 still conducting, which was greater than the number of responders following control (mean response  
332 = 37.5%, SEM 3.0 ; n = 2 mice).

333 **Nav1.7 is the major TTX-S subtype in the proportion of nociceptors blocked by TTX**

334 *In vivo* recordings were made from 19 A-fibre (n=5 mice) and 62 C-fibre sensory neurons (n=18 mice)  
335 that had conduction velocities which ranged from 19.9-40.3 m/s and 0.4-1.1 m/s respectively.

336 Conduction velocities of C-fibre neurons at baseline were not significantly different between the  
337 three treatment groups (p= 0.26, Kruskal-Wallis test; Table 1). Mechanical receptive fields were  
338 identified in the majority of A-fibre and C-fibre neurons identified electrically and were all located on  
339 the plantar surface of the hind paw (Table 1). C-fibres with mechanical receptive fields only  
340 responded to strong mechanical stimulation of the hind paw indicating that they were nociceptive.

341 We utilised the selective Nav1.7 blocker PF007 to examine how many nociceptors depend on Nav1.7  
342 for propagation[1]. Preliminary dose range finding studies carried out in *ex vivo* compound action  
343 potential (CAP) experiments found that 100-300nM PF007 applied between stimulating and  
344 recording sites reduced the C-CAP but not the A-CAP (data not shown). In *in vivo* recordings, topical  
345 application of 100nM-1 $\mu$ M PF-007 blocked conduction in 68.4% (13/19) of C-fibre neurons, whereas  
346 vehicle application only blocked conduction in 8.3% (1/12; p<0.001 Fishers exact test; Fig 4 A & G).  
347 Notably, the majority of C-fibre neurons blocked by PF007 were blocked at the most selective  
348 concentration of PF007 (47.4% blocked following 100nM PF007; Fig 4B & C). Application of TTX  
349 blocked conduction in a similar proportion (63.6%) of C-fibre neurons (14/22 blocked following  
350 30nM-1 $\mu$ M; Fig 4A & D). Further application of 10 $\mu$ M TTX did not cause any additional increase the  
351 proportion of fibres blocked (7/11 blocked following 30nM-10 $\mu$ M from 2 mice). Conduction slowing  
352 typically preceded conduction block in C-fibre neurons following PF007 and TTX application, but not  
353 vehicle (See examples in traces 4B, D & E). Application of 9mM Lidocaine blocked conduction in all C-  
354 fibre neurons (18/18 from n=5 mice; Fig 4E & G). In comparison to C-fibres, the application of  
355 300nM-1 $\mu$ M PF007 did not cause significant conduction block in A-fibre neurons (5.3% (1/19,  
356 p<0.001 Fishers exact test compared to C-fibre; Fig 4A, F & G). All A-fibre neurons that were not  
357 blocked by 300nM-1 $\mu$ M PF007 were blocked subsequently by application of 1 $\mu$ M TTX (14/14 from n  
358 = 4 mice, Fig 4F & G).

359 Topical drug experiments with PF007 were repeated in GCaMP6s labelled mice to corroborate  
360 electrophysiological findings. Surprisingly, in this preparation, application of PF007 to the sciatic  
361 nerve between stimulating and recording sites did not exert a significant block on axonal  
362 propagation ( $F(1, 6)$  [Drug] = 0.58,  $P=0.47$ ; 3-Way ANOVA), even when the concentration was  
363 increased from 300 nM to 1  $\mu$ M ( $F(1, 6)$  [Dose] = 2.55,  $P=0.16$ ; 3-Way ANOVA). There was, however,  
364 a significant main effect of neuron size ( $F$  [Size] (1, 6) = 19.44,  $P<0.01$ ); the proportion of small to  
365 medium sized neurons blocked at 300 nM (17.3%, SEM 4.1) and 1  $\mu$ M (21.1%, SEM 5.0) was  
366 significantly greater than that of the large sized neurons at each corresponding dose (300 nM mean  
367 block = 3.8%, SEM 2.5; 1  $\mu$ M mean block = 2.6%, SEM 2.6;  $p<0.05$  and  $p<0.01$  respectively, Sidak's  
368 post-hoc comparison;  $n = 4$  mice/group; Fig 5B). Similar to the % block in the small to medium sized  
369 group, PF007 only blocked 17.9% (SEM 5.6) and 15.0% (SEM 5.5) of heat sensitive nociceptors at 300  
370 nM and 1  $\mu$ M respectively, which was not significantly different to that of the control (mean block =  
371 9.1%, SEM 3.2 and 10.2%, SEM 3.4 following vehicle 1 & 2 respectively;  $F(1, 6)$  [Drug] = 1.16  $P=0.32$ ,  
372 2-way ANOVA; Fig 5c).

373 The reason for the discrepancy in the proportion of nociceptors blocked by PF007 between  
374 electrophysiological and calcium imaging experiments was not clear and therefore we decided to  
375 use a different class of sodium channel blocker to further investigate this. Due to the limited  
376 availability of Nav1.7 selective inhibitors in the mouse, we used 4,9 AH TTX, a selective blocker of  
377 Nav1.1 and Nav1.6 [10; 39], and then blocked Nav1.7 in addition to these channels with TTX. The  
378 population dependent on Nav1.7 for propagation can be estimated by subtracting the number of  
379 neurons blocked after 4,9 AH TTX from the total blocked after subsequent TTX application. In pilot  
380 dose range finding experiments, application of 1  $\mu$ M 4,9 AH TTX did not block propagation in small to  
381 medium or large sized neurons (data not shown). In contrast, application of 3  $\mu$ M 4,9 AH TTX to the  
382 sciatic nerve in-between stimulating and recording sites caused propagation failure in a significant  
383 number of neurons ( $F(1, 6)$  [Drug] = 77.12  $P=0.0001$ ). The main effects of Size ( $F(1, 6) = 104.1$ ,  
384  $P<0.0001$ ) and the interaction between Drug x Size ( $F(1, 6) = 31.73$ ,  $P<0.01$ ) were also significant. 4,9  
385 AH TTX blocked conduction in 30.4% (SEM 5.7) of small to medium sized neurons, which was  
386 greater, but not significantly different, to that of the time-matched control (mean block = 16.3%,  
387 SEM 1.6;  $p = 0.23$ , Sidak's post-hoc comparison;  $n = 4$  mice/group; Fig 6A & B). In contrast, 4,9 AH TTX  
388 blocked (80.8%, SEM 2.6) large sized neurons, which was significantly different to the control (mean  
389 block = 8.1%, SEM 2.7%,  $p<0.0001$ , Sidak's post-hoc comparison; Fig 6A & B, Movie 3). Subsequent  
390 addition of 1  $\mu$ M TTX to the sciatic nerve further impacted axonal propagation. The main effect of  
391 TTX addition was significant ( $F(1, 6) = 1136$ ,  $P<0.0001$ ), as were several interactions, including that  
392 between Drug x Size x TTX addition ( $F(1, 6) = 28.24$ ,  $P<0.01$ ). The proportion of small to medium

393 neurons blocked by TTX increased to 73.5% (SEM 2.1) in the 4,9 AH TTX group and 70.3% (SEM 4.7)  
394 in the vehicle group, which were both significantly different to the block produced previously (both  
395  $p < 0.001$ , Sidak's post-hoc comparison to block following 4,9 AH TTX or vehicle respectively; Fig 6 B).  
396 In contrast, subsequent TTX application caused a significant increase in the % block in large sized  
397 neurons in the vehicle group (mean block = 92.2%, SEM 2.7;  $p < 0.0001$ , Sidak's post-hoc comparison  
398 to vehicle), but not the 4,9 AH TTX group (mean block = 98.8%, SEM 1.3;  $p = 0.06$ , Sidak's post-hoc  
399 comparison to 4,9 AH TTX).

400 To examine the effects of blocking axonal Nav1.1 and Nav1.6 with 4,9 AH TTX in nociceptors, we  
401 compared block in neurons that responded to noxious heat at the beginning of the experiment. In  
402 contrast to the % block in small to medium sized neurons, a lower proportion of heat sensitive  
403 nociceptors were blocked by 4,9 AH TTX (19.2%, SEM, 2.7), which was not significantly different to  
404 the control (22.1%, SEM, 4.6;  $F(1, 6)$  [Drug] = 0.08,  $P = 0.77$ , 2-WAY RM ANOVA). Subsequent addition  
405 of TTX to the sciatic nerve had a significant effect on axonal propagation in heat sensitive  
406 nociceptors ( $F(1, 6)$  [TTX addition] = 137.8,  $P < 0.0001$ ). The proportion of heat nociceptors blocked  
407 by TTX increased to 59.6% (SEM 7.5) in the 4,9 AH TTX group and 60.5% (SEM 4.7) in the vehicle  
408 group, which were both significantly different to the block produced previously (both  $p < 0.001$ ,  
409 Sidak's post-hoc comparison to block following 4,9 AH TTX or vehicle respectively; Fig 6 C).

## 410 Discussion

411 The proportion of C-fibre nociceptive neurons that depend on TTX-S Navs for axonal propagation  
412 between the peripheral terminals and the DRG is reported to vary between studies [27; 37; 52], and  
413 the contribution of Nav1.7 in particular has not been well defined. In this study, we utilised blockers  
414 of Nav1.7 and other TTX-S channels to determine the precise contribution of Nav1.7 to axonal  
415 propagation in nociceptors. Specifically, we have shown that only around 2/3 of nociceptors  
416 innervating the skin, and less than half of those innervating the muscle, depend on TTX-S channels  
417 for axonal propagation. A similar proportion of C-fibre nociceptors innervating the skin were blocked  
418 using a selective inhibitor of Nav1.7, suggesting that this channel is the most essential for  
419 propagation in the TTX-S population. Finally, our data has revealed that several polymodal  
420 mechanoheat sensitive and TRPV1 expressing nociceptors innervating the skin are not dependent on  
421 TTX-S Navs for propagation.

422 Around 2/3<sup>rd</sup>s of nociceptive sensory neurons innervating the skin were blocked following axonal  
423 application of TTX. While some previous studies examining TTX block of C-fibre CAPs have reported  
424 up to 96% block of propagation along peripheral nerve [27; 37], it is possible that TTX block in these  
425 studies was overestimated due to temporal dispersion of compound C-potentials. Moreover, these

426 studies examined C-fibres CAPS in peripheral nerves that contain sympathetic C-fibres, which  
427 express Nav1.7 but not TTX-R channels [55], potentially confounding interpretation. Our  
428 electrophysiological data revealed that, similar to TTX block, 2/3<sup>rd</sup>s of C-fibre neurons were blocked  
429 by axonal application of the Nav1.7 inhibitor PF007, which suggests that Nav1.7 is the TTX-S Nav  
430 subtype essential for axonal propagation in this population of nociceptors. However, this does not  
431 necessarily mean that Nav1.8, which is expressed in virtually all nociceptors [44; 55] and the major  
432 contributor to the upstroke of the nociceptor action potential [38], has no role in propagation in this  
433 population. For example, it is plausible that a block of Nav1.7 prevents the membrane reaching the  
434 more depolarised threshold required for Nav1.8 activation.

435 It is not clear why PF007 failed to reproduce the same level of propagation block when examined in  
436 our in vivo calcium imaging experiments. Mouse strain differences can be ruled out because a similar  
437 proportion of C-fibre neurons were blocked by PF007 *ex vivo* in c57 mice compared to that found in  
438 vivo in CD1 mice. Although different forms of electrical stimulation were used to assess axonal  
439 propagation between experiments (imaging 4Hz vs 0.1-0.2Hz electrophysiology), higher frequency  
440 stimulation would have been expected to facilitate block based on the state dependent  
441 characteristics of PF007 [1].

442 Our electrophysiological and calcium imaging data revealed that ~1/3rd of nociceptors do not  
443 depend on Nav1.7 or other TTX-S Navs for axonal propagation. This might explain why peripherally  
444 restricted Nav1.7 inhibitors have not provided effective pain relief for chronic pain sufferers [25]. It  
445 also suggests that there is a sizable population of neurons in which Nav1.7 and other TTX-S Navs are  
446 not required for membrane depolarization in order to generate action potentials. As TTX-R neurons  
447 were blocked by 1mM lidocaine, which is likely only selective for Navs [42; 46; 53], axonal  
448 propagation in these neurons is dependent on the only other TTX-R Nav's expressed in sensory  
449 neurons, Nav1.8 and Nav1.9. Indeed, a previous study identified Nav1.8 as the essential TTX-R  
450 channel for propagation in this population [27]. We did not attempt to repeat this finding via  
451 pharmacological Nav1.8 inhibition because the selectivity of most Nav1.8 compounds against Nav1.9  
452 have not been tested due to the difficulty of expressing Nav1.9 channels in heterologous cell lines  
453 [32], and other selective compounds, such as A-803467, are reported to lack efficacy in rodent  
454 peripheral nerve preparations [27]. Nonetheless, our findings provide further indirect evidence in  
455 support of Nav1.8 being the most critical Nav in the TTX-R population: we found that many TTX-R  
456 neurons were TRPV1 peptidergic nociceptors, which are reported to lack Nav1.9 protein [12; 40].

457 It is reported that almost every nociceptor (~90%) expresses Nav1.8 protein [44]; this raises the  
458 question of why some nociceptors, but not others, can propagate action potentials without other

459 Navs. Although the relatively depolarised threshold for Nav1.8 activation implies that other Navs are  
460 usually required for action potential generation [38], reports demonstrate that some nociceptors  
461 can generate [47] and propagate [27] signals with Nav1.8 channels alone, and this suggests that  
462 Nav1.8 channels in these neurons could have unique gating properties to enable this. For instance,  
463 they may have different post-translational modifications, or contain different beta subunits  
464 combinations [22], which causes channels to activate at more hyperpolarised potentials, thereby  
465 enabling function without other Navs. Alternatively, this population of neurons could have a more  
466 depolarised resting membrane potential [11], which would negate the need for other threshold  
467 Navs.

468 Our in vivo imaging data revealed that polymodality is common in sensory neurons innervating  
469 glabrous skin, which is consistent with that previously found in our lab using this technique [8]. We  
470 found that a higher proportion of small to medium sized M-H polymodal (~40%) were resistant to  
471 axonal TTX compared to those only sensitive to mechanical stimuli, which likely reflects that some of  
472 the neurons that are exclusively mechanosensitive are low threshold non-nociceptive neurons that  
473 don't typically express TTX-R Navs. The proportion of polymodal neurons blocked by TTX along the  
474 axon are similar to that reported previously when examining TTX-R transduction at the peripheral  
475 terminals [47; 57]. Although it is tempting to speculate that the neurons resistant to TTX at the  
476 terminal represent an overlapping population to those TTX-R along the axon, TTX is reported to  
477 differentially block excitability at the terminals compared to the axon in jugular nociceptors, which  
478 suggests the expression of TTX-R Navs may differ between neuronal compartments in some neurons  
479 [28].

480 Most high threshold pinch responsive muscle afferents (55%) were not blocked by axonal TTX  
481 application, whereas all low threshold cutaneous afferents were blocked by TTX, suggesting that full  
482 block of TTX-S channels was achieved and that these propagating muscle afferents do not depend on  
483 TTX-S Navs for propagation. Our data are consistent with previous reports that numerous high  
484 threshold C-fibre nociceptors innervating the muscle do not require TTX-S Navs for action potential  
485 propagation [31; 45]. The TTX-R muscle afferents were blocked by subsequent application of  
486 lidocaine and therefore depend on TTX-R Navs for propagation. The hallmarks of chronic pain -  
487 ectopic activity in nociceptors, spontaneous pain and central sensitisation within the spinal cord -  
488 are more likely to arise following injury to the nerves and tissue of deep structures, compared to  
489 those of the skin [26; 49; 54]. Therefore, preferential targeting of Nav subtypes expressed in muscle  
490 afferents could be an effective strategy for blocking abnormal activity in these neurons. Given that  
491 many muscle nociceptors do not depend on Nav1.7 for propagation, and that pain that is deep in



492 origin is a frequently reported in many chronic pain conditions [2; 4; 30; 34], it is unlikely that  
493 peripherally restricted Nav1.7 inhibitors would provide effective pain relief in these individuals.

494 The TTX block of nearly all large sized neurons or those that responded to low threshold brush  
495 suggests that large sized low threshold responsive afferents depend on TTX-S channels for axonal  
496 propagation, which is consistent with previous findings [27; 37; 43; 52]. Our electrophysiological  
497 data revealed that rapidly conducting A-fibre neurons (likely consistent with the large sized neurons  
498 imaged) were not blocked by Nav1.7 inhibition, thereby suggesting that the channel does not make  
499 a substantial contribution to propagation in these neurons. In contrast, nearly all the large sized  
500 neurons were blocked with 4,9 AH TTX, a selective inhibitor of Nav1.1 and Nav1.6, suggesting that  
501 either one or both channels support axonal propagation in this population. Nav1.6 is expressed at  
502 nodes of Ranvier in large sized neurons [5; 6], and a previous pharmacological study identified it as  
503 being the major contributor to axonal propagation in A-fibres [52].

## 504 **Conclusion**

505 Our data indicate that Nav1.7 has an essential role in axonal propagation between cutaneous  
506 terminals and the DRG in only around 2/3rds of nociceptive neurons, whereas propagation in the  
507 remaining third appears critically dependent on TTX-R Nav subtypes. In the majority of muscle  
508 afferent nociceptors propagation is not critically dependent on Nav1.7 or other TTX-S channels.

## 509 **Acknowledgments**

510 This research was supported by a research grant from Mundipharma Research Limited, Cambridge,  
511 UK. We thank Professor Thomas Sears and Dr Martyn Jones for helping to set up in vivo  
512 electrophysiological experiments.

## 513 **Conflicts of interest**

514 The authors declare no conflicts of Interest

## 515 **Author contributions**

516 G.G. conceived, designed, and performed all the experiments, analysed data and wrote the  
517 manuscript; S.M conceived experiments and provided conceptual input on the project. F.D. provided  
518 conceptual input on the manuscript and corrected the manuscript; E.B.S provided conceptual input  
519 on the project and corrected the manuscript; S.B.M. conceived, designed, supervised, and corrected  
520 the manuscript.

## 521 **References**

- 522 [1] Alexandrou AJ, Brown AR, Chapman ML, Estacion M, Turner J, Mis MA, Wilbrey A, Payne EC,  
523 Gutteridge A, Cox PJ, Doyle R, Printzenhoff D, Lin Z, Marron BE, West C, Swain NA, Storer RI,  
524 Stupple PA, Castle NA, Hounshell JA, Rivara M, Randall A, Dib-Hajj SD, Krafte D, Waxman SG,  
525 Patel MK, Butt RP, Stevens EB. Subtype-Selective Small Molecule Inhibitors Reveal a  
526 Fundamental Role for Nav1.7 in Nociceptor Electrogenesis, Axonal Conduction and  
527 Presynaptic Release. *PLoS ONE* 2016;11(4):e0152405-e0152405.
- 528 [2] Birklein F, Schmelz M, Schifter S, Weber M. The important role of neuropeptides in complex  
529 regional pain syndrome. *Neurology* 2001;57(12):2179-2184.
- 530 [3] Bove GM, Ransil BJ, Lin HC, Leem JG. Inflammation induces ectopic mechanical sensitivity in  
531 axons of nociceptors innervating deep tissues. *J Neurophysiol* 2003;90(3):1949-1955.
- 532 [4] Bove GM, Zaheen A, Bajwa ZH. Subjective nature of lower limb radicular pain. *J Manipulative*  
533 *Physiol Ther* 2005;28(1):12-14.
- 534 [5] Caldwell JH, Schaller KL, Lasher RS, Peles E, Levinson SR. Sodium channel Na(v)1.6 is localized at  
535 nodes of ranvier, dendrites, and synapses. *Proc Natl Acad Sci U S A* 2000;97(10):5616-5620.
- 536 [6] Chen L, Huang J, Zhao P, Persson AK, Dib-Hajj FB, Cheng X, Tan A, Waxman SG, Dib-Hajj SD.  
537 Conditional knockout of Nav1.6 in adult mice ameliorates neuropathic pain. *Sci Rep*  
538 2018;8(1):3845.
- 539 [7] Chen TW, Wardill TJ, Sun Y, Pulver SR, Renninger SL, Baohan A, Schreiter ER, Kerr RA, Orger MB,  
540 Jayaraman V, Looger LL, Svoboda K, Kim DS. Ultrasensitive fluorescent proteins for imaging  
541 neuronal activity. *Nature* 2013;499(7458):295-300.
- 542 [8] Chisholm KI, Khovanov N, Lopes DM, La Russa F, McMahan SB. Large Scale In Vivo Recording of  
543 Sensory Neuron Activity with GCaMP6. *eneuro* 2018;5(1):ENEURO.0417-0417.
- 544 [9] Cox JJ, Reimann F, Nicholas AK, Thornton G, Roberts E, Springell K, Karbani G, Jafri H, Mannan J,  
545 Raashid Y, Al-Gazali L, Hamamy H, Valente EM, Gorman S, Williams R, McHale DP, Wood JN,  
546 Gribble FM, Woods CG. An SCN9A channelopathy causes congenital inability to experience  
547 pain. *Nature* 2006;444(7121):894-898.
- 548 [10] Denomme N, Lukowski AL, Hull JM, Jameson MB, Bouza AA, Narayan ARH, Isom LL. The voltage-  
549 gated sodium channel inhibitor, 4,9-anhydrotetrodotoxin, blocks human Nav1.1 in addition  
550 to Nav1.6. *Neurosci Lett* 2020;724:134853.
- 551 [11] Du X, Hao H, Gigout S, Huang D, Yang Y, Li L, Wang C, Sundt D, Jaffe DB, Zhang H, Gamper N.  
552 Control of somatic membrane potential in nociceptive neurons and its implications for  
553 peripheral nociceptive transmission. *Pain* 2014;155(11):2306-2322.
- 554 [12] Fang X, Djouhri L, McMullan S, Berry C, Waxman SG, Okuse K, Lawson SN. Intense isolectin-B4  
555 binding in rat dorsal root ganglion neurons distinguishes C-fiber nociceptors with broad  
556 action potentials and high Nav1.9 expression. *J Neurosci* 2006;26(27):7281-7292.
- 557 [13] Fang X, McMullan S, Lawson SN, Djouhri L. Electrophysiological differences between nociceptive  
558 and non-nociceptive dorsal root ganglion neurones in the rat in vivo. *J Physiol* 2005;565(Pt  
559 3):927-943.
- 560 [14] Feng B, Zhu Y, La JH, Wills ZP, Gebhart GF. Experimental and computational evidence for an  
561 essential role of Nav1.6 in spike initiation at stretch-sensitive colorectal afferent endings. *J*  
562 *Neurophysiol* 2015;113(7):2618-2634.
- 563 [15] Fink BR, Cairns AM. Differential peripheral axon block with lidocaine: unit studies in the cervical  
564 vagus nerve. *Anesthesiology* 1983;59(3):182-186.
- 565 [16] Galer BS, Rowbotham MC, Perander J, Friedman E. Topical lidocaine patch relieves postherpetic  
566 neuralgia more effectively than a vehicle topical patch: results of an enriched enrollment  
567 study. *Pain* 1999;80(3):533-538.
- 568 [17] Goldberg YP, MacFarlane J, MacDonald ML, Thompson J, Dube MP, Mattice M, Fraser R, Young  
569 C, Hossain S, Pape T, Payne B, Radomski C, Donaldson G, Ives E, Cox J, Younghusband HB,  
570 Green R, Duff A, Boltshauser E, Grinspan GA, Dimon JH, Sibley BG, Andria G, Toscano E,  
571 Kerdraon J, Bowsher D, Pimstone SN, Samuels ME, Sherrington R, Hayden MR. Loss-of-

- 572 function mutations in the Nav1.7 gene underlie congenital indifference to pain in multiple  
573 human populations. *Clin Genet* 2007;71(4):311-319.
- 574 [18] Goodwin G, Bove GM, Dayment B, Dilley A. Characterizing the Mechanical Properties of Ectopic  
575 Axonal Receptive Fields in Inflamed Nerves and Following Axonal Transport Disruption.  
576 *Neuroscience* 2020;429:10-22.
- 577 [19] Haroutounian S, Nikolajsen L, Bendtsen TF, Finnerup NB, Kristensen AD, Hasselstrom JB, Jensen  
578 TS. Primary afferent input critical for maintaining spontaneous pain in peripheral  
579 neuropathy. *Pain* 2014;155(7):1272-1279.
- 580 [20] Hockley JR, Gonzalez-Cano R, McMurray S, Tejada-Giraldez MA, McGuire C, Torres A, Wilbrey  
581 AL, Cibert-Goton V, Nieto FR, Pitcher T, Knowles CH, Baeyens JM, Wood JN, Winchester WJ,  
582 Bulmer DC, Cendan CM, McMurray G. Visceral and somatic pain modalities reveal Nav 1.7-  
583 independent visceral nociceptive pathways. *J Physiol* 2017;595(8):2661-2679.
- 584 [21] Hoffmann T, Sharon O, Wittmann J, Carr RW, Vyshnevskaya A, Col R, Nassar MA, Reeh PW,  
585 Weidner C. Nav1.7 and pain: contribution of peripheral nerves. *Pain* 2018;159(3):496-506.
- 586 [22] Hull JM, Isom LL. Voltage-gated sodium channel beta subunits: The power outside the pore in  
587 brain development and disease. *Neuropharmacology* 2018;132:43-57.
- 588 [23] Jaffe RA, Rowe MA. Differential nerve block. Direct measurements on individual myelinated and  
589 unmyelinated dorsal root axons. *Anesthesiology* 1996;84(6):1455-1464.
- 590 [24] Jeftinija S. The role of tetrodotoxin-resistant sodium channels of small primary afferent fibers.  
591 *Brain Research* 1994;639(1):125-134.
- 592 [25] Kingwell K. Nav1.7 withholds its pain potential. *Nat Rev Drug Discov* 2019.
- 593 [26] Kirillova I, Rausch VH, Tode J, Baron R, Jänig W. Mechano- and thermosensitivity of injured  
594 muscle afferents. *Journal of Neurophysiology* 2011;105(5):2058-2073.
- 595 [27] Klein AH, Vyshnevskaya A, Hartke TV, De Col R, Mankowski JL, Turnquist B, Bosmans F, Reeh PW,  
596 Schmelz M, Carr RW, Ringkamp M. Sodium Channel Nav1.8 Underlies TTX-Resistant Axonal  
597 Action Potential Conduction in Somatosensory C-Fibers of Distal Cutaneous Nerves. *J*  
598 *Neurosci* 2017;37(20):5204-5214.
- 599 [28] Kollarik M, Sun H, Herbstsomer RA, Ru F, Kocmalova M, Meeker SN, Udem BJ. Different role of  
600 TTX-sensitive voltage-gated sodium channel (Nav 1) subtypes in action potential initiation  
601 and conduction in vagal airway nociceptors. *J Physiol* 2018;596(8):1419-1432.
- 602 [29] Kornecook TJ, Yin R, Altmann S, Be X, Berry V, Ilch CP, Jarosh M, Johnson D, Lee JH, Lehto SG,  
603 Ligutti J, Liu D, Luther J, Matson D, Ortuno D, Roberts J, Taborn K, Wang J, Weiss MM, Yu V,  
604 Zhu DXD, Fremeau RT, Jr., Moyer BD. Pharmacologic Characterization of AMG8379, a Potent  
605 and Selective Small Molecule Sulfonamide Antagonist of the Voltage-Gated Sodium Channel  
606 Nav1.7. *J Pharmacol Exp Ther* 2017;362(1):146-160.
- 607 [30] Koroschetz J, Rehm SE, Gockel U, Brosz M, Freynhagen R, Tolle TR, Baron R. Fibromyalgia and  
608 neuropathic pain--differences and similarities. A comparison of 3057 patients with diabetic  
609 painful neuropathy and fibromyalgia. *BMC Neurol* 2011;11:55.
- 610 [31] Lambertz D, Hoheisel U, Mense S. Distribution of synaptic field potentials induced by TTX-  
611 resistant skin and muscle afferents in rat spinal segments L4 and L5. *Neurosci Lett*  
612 2006;409(1):14-18.
- 613 [32] Lin Z, Santos S, Padilla K, Printzenhoff D, Castle NA. Biophysical and Pharmacological  
614 Characterization of Nav1.9 Voltage Dependent Sodium Channels Stably Expressed in HEK-  
615 293 Cells. *PLoS ONE* 2016;11(8):e0161450.
- 616 [33] MacDonald DI, Sikandar S, Weiss J, Pyrski M, Luiz AP, Millet Q, Emery EC, Mancini F, Iannetti GD,  
617 Alles SRA, Zhao J, Cox JJ, Brownstone RM, Zufall F, Wood JN. The mechanism of analgesia in  
618 Nav1.7 null mutants. *bioRxiv* 2020:2020.2006.2001.127183.
- 619 [34] Moulin DE, Hagen N, Feasby TE, Amireh R, Hahn A. Pain in Guillain-Barre syndrome. *Neurology*  
620 1997;48(2):328-331.

- 621 [35] Pachitariu M, Stringer C, Dipoppa M, Schröder S, Rossi LF, Dalgleish H, Carandini M, Harris KD.  
622 Suite2p: beyond 10,000 neurons with standard two-photon microscopy. *bioRxiv*  
623 2017:061507.
- 624 [36] Papadatos GA, Wallerstein PM, Head CE, Ratcliff R, Brady PA, Benndorf K, Saumarez RC, Trezise  
625 AE, Huang CL, Vandenberg JI, Colledge WH, Grace AA. Slowed conduction and ventricular  
626 tachycardia after targeted disruption of the cardiac sodium channel gene *Scn5a*. *Proc Natl*  
627 *Acad Sci U S A* 2002;99(9):6210-6215.
- 628 [37] Pinto V, Derkach VA, Safronov BV. Role of TTX-sensitive and TTX-resistant sodium channels in  
629 A-delta- and C-fiber conduction and synaptic transmission. *J Neurophysiol* 2008;99(2):617-  
630 628.
- 631 [38] Renganathan M, Cummins TR, Waxman SG. Contribution of Na(v)1.8 sodium channels to action  
632 potential electrogenesis in DRG neurons. *J Neurophysiol* 2001;86(2):629-640.
- 633 [39] Rosker C, Lohberger B, Hofer D, Steinecker B, Quasthoff S, Schreibmayer W. The TTX metabolite  
634 4,9-anhydro-TTX is a highly specific blocker of the Na(v1.6) voltage-dependent sodium  
635 channel. *Am J Physiol Cell Physiol* 2007;293(2):C783-789.
- 636 [40] Salvatierra J, Diaz-Bustamante M, Meixiong J, Tierney E, Dong X, Bosmans F. A disease mutation  
637 reveals a role for NaV1.9 in acute itch. *J Clin Invest* 2018;128(12):5434-5447.
- 638 [41] Schmalhofer WA, Calhoun J, Burrows R, Bailey T, Kohler MG, Weinglass AB, Kaczorowski GJ,  
639 Garcia ML, Koltzenburg M, Priest BT. ProTx-II, a selective inhibitor of NaV1.7 sodium  
640 channels, blocks action potential propagation in nociceptors. *Mol Pharmacol*  
641 2008;74(5):1476-1484.
- 642 [42] Scholz A, Vogel W. Tetrodotoxin-resistant action potentials in dorsal root ganglion neurons are  
643 blocked by local anesthetics. *Pain* 2000;89(1):47-52.
- 644 [43] Schomburg ED, Steffens H, Mense S. Contribution of TTX-resistant C-fibres and A delta-fibres to  
645 nociceptive flexor-reflex and non-flexor-reflex pathways in cats. *BritJAnaesth*  
646 2000;37(4):277-287.
- 647 [44] Shields SD, Ahn HS, Yang Y, Han C, Seal RP, Wood JN, Waxman SG, Dib-Hajj SD. Nav1.8  
648 expression is not restricted to nociceptors in mouse peripheral nervous system. *Pain*  
649 2012;153(10):2017-2030.
- 650 [45] Steffens H, Eek B, Trudrung P, Mense S. Tetrodotoxin block of A-fibre afferents from skin and  
651 muscle - a tool to study pure C-fibre effects in the spinal cord. *Pflugers Archiv - European*  
652 *Journal of Physiology* 2003;445(5):607-613.
- 653 [46] Sugiyama K, Muteki T. Local anesthetics depress the calcium current of rat sensory neurons in  
654 culture. *Anesthesiology* 1994;80(6):1369-1378.
- 655 [47] Touska F, Turnquist B, Vlachova V, Reeh PW, Leffler A, Zimmermann K. Heat-resistant action  
656 potentials require TTX-resistant sodium channels NaV1.8 and NaV1.9. *J Gen Physiol*  
657 2018;150(8):1125-1144.
- 658 [48] Vaso A, Adahan HM, Gjika A, Zahaj S, Zhurda T, Vyshka G, Devor M. Peripheral nervous system  
659 origin of phantom limb pain. *Pain* 2014;155(7):1384-1391.
- 660 [49] Wall PD, Woolf CJ. Muscle but not cutaneous C-afferent input produces prolonged increases in  
661 the excitability of the flexion reflex in the rat. *JPhysiolLond* 1984;356:443-458.
- 662 [50] Wang F, Bélanger E, Côté SL, Desrosiers P, Prescott SA, Côté DC, De Koninck Y. Sensory Afferents  
663 Use Different Coding Strategies for Heat and Cold. *Cell Reports* 2018;23(7):2001-2013.
- 664 [51] Weiss J, Pyrski M, Jacobi E, Bufe B, Willnecker V, Schick B, Zizzari P, Gossage SJ, Greer CA,  
665 Leinders-Zufall T, Woods CG, Wood JN, Zufall F. Loss-of-function mutations in sodium  
666 channel Nav1.7 cause anosmia. *Nature* 2011;472(7342):186-190.
- 667 [52] Wilson MJ, Yoshikami D, Azam L, Gajewiak J, Olivera BM, Bulaj G, Zhang MM. mu-Conotoxins  
668 that differentially block sodium channels NaV1.1 through 1.8 identify those responsible for  
669 action potentials in sciatic nerve. *Proc Natl Acad Sci U S A* 2011;108(25):10302-10307.
- 670 [53] Xiong Z, Strichartz GR. Inhibition by local anesthetics of Ca<sup>2+</sup> channels in rat anterior pituitary  
671 cells. *European Journal of Pharmacology* 1998;363(1):81-90.

- 672 [54] Xu J, Brennan TJ. Guarding pain and spontaneous activity of nociceptors after skin versus skin  
673 plus deep tissue incision. *Anesthesiology* 2010;112(1):153-164.
- 674 [55] Zeisel A, Hochgerner H, Lonnerberg P, Johnsson A, Memic F, van der Zwan J, Haring M, Braun E,  
675 Borm LE, La Manno G, Codeluppi S, Furlan A, Lee K, Skene N, Harris KD, Hjerling-Leffler J,  
676 Arenas E, Ernfors P, Marklund U, Linnarsson S. Molecular Architecture of the Mouse Nervous  
677 System. *Cell* 2018;174(4):999-1014 e1022.
- 678 [56] Zimmermann K, Hein A, Hager U, Kaczmarek JS, Turnquist BP, Clapham DE, Reeh PW.  
679 Phenotyping sensory nerve endings in vitro in the mouse. *Nat Protoc* 2009;4(2):174-196.
- 680 [57] Zimmermann K, Leffler A, Babes A, Cendan CM, Carr RW, Kobayashi J, Nau C, Wood JN, Reeh  
681 PW. Sensory neuron sodium channel Nav1.8 is essential for pain at low temperatures.  
682 *Nature* 2007;447(7146):855-858.

683

684 **Figures and tables**

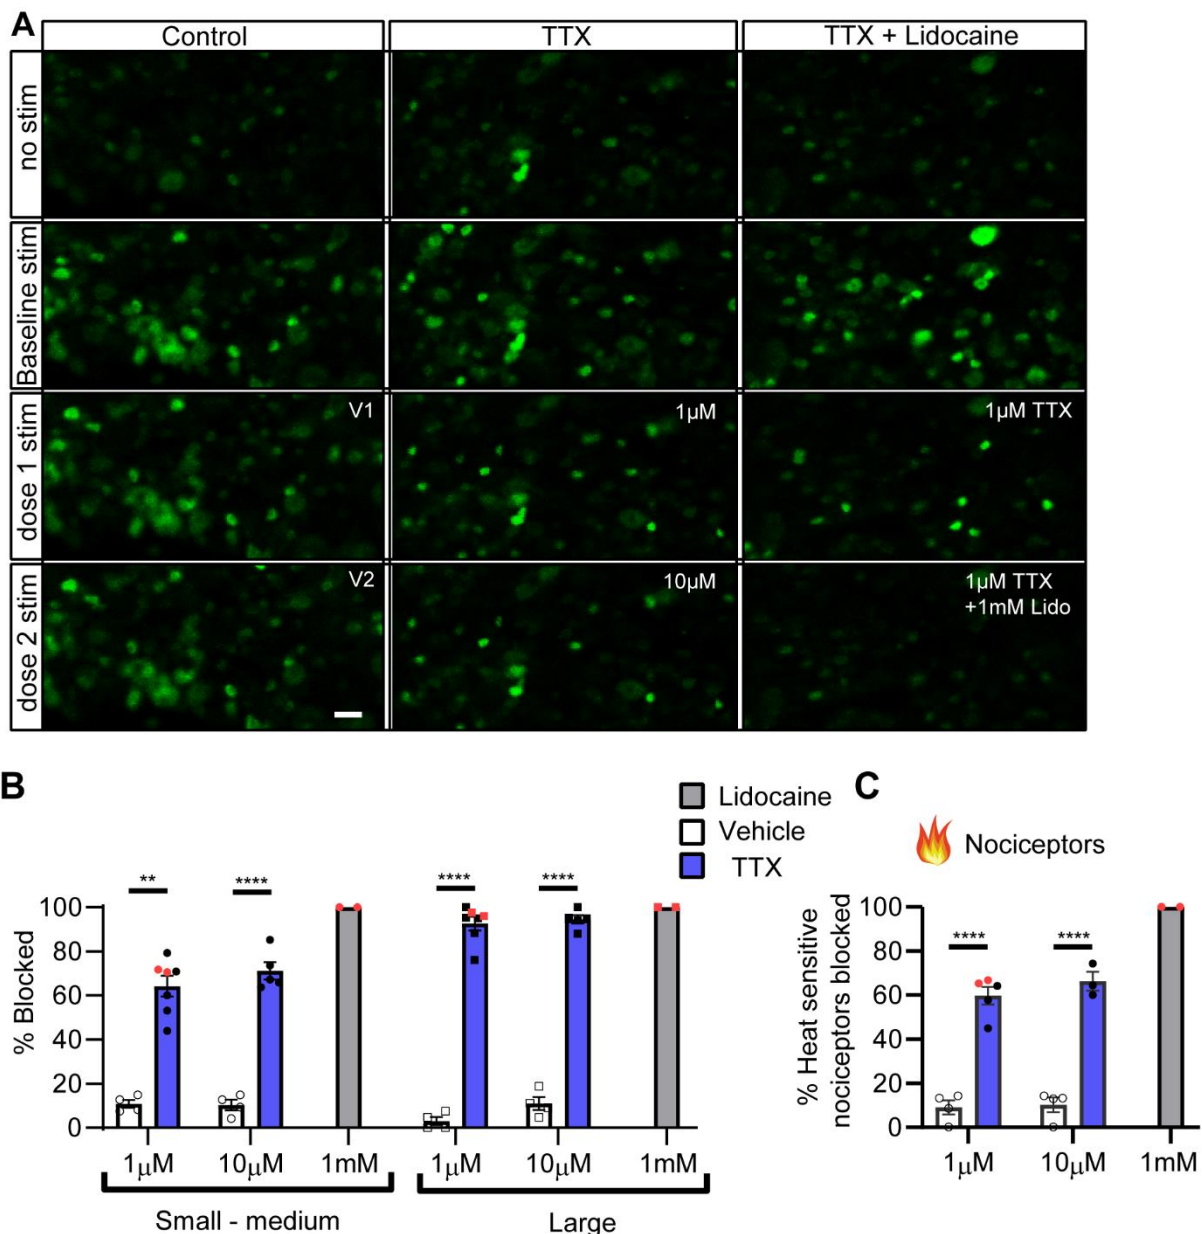

685

686 **Figure 1. Axonal TTX application blocks propagation in nearly all large sized neurons but only ~2/3**  
 687 **of small to medium sized neurons.** Example images of L4 DRG cell bodies from in-vivo GCaMP6s  
 688 time lapse recordings (A). Frames were extracted at baseline and at the peak of electrical stimulation  
 689 at baseline and following each drug dose. The bar graphs show the proportion of neurons blocked  
 690 following drug application to the nerve when neurons are grouped by size (B) and for neurons  
 691 responding to noxious heat stimulation of the terminal (C). Each point represents the proportion of  
 692 neurons blocked in an individual animal. 47-136 small to medium, 11-41 large neurons and 14-54  
 693 heat responsive neurons were sampled between animals. Note that all sizes of neurons are activated  
 694 by electrical stimulation of the paw at baseline. The electrically induced response was blocked in  
 695 nearly all large sized cells following TTX application to the nerve, but only a proportion of small to  
 696 medium sized neurons (middle panel). Small to medium sized neurons not blocked by TTX were  
 697 blocked by lidocaine (right panel in A, grey bars in B & C). The red coloured dots denote the  
 698 experiments in which lidocaine and TTX were applied to the nerve following 1 $\mu$ M TTX. Bar graphs  
 699 represent mean  $\pm$  SEM. Scale bar = 50 $\mu$ M. 10x magnification. 3-way ANOVA for B) and RM 2-way  
 700 ANOVA for C). \*\*  $p < 0.01$ , \*\*\*\*  $p < 0.0001$  vs control Sidak's post hoc.

701

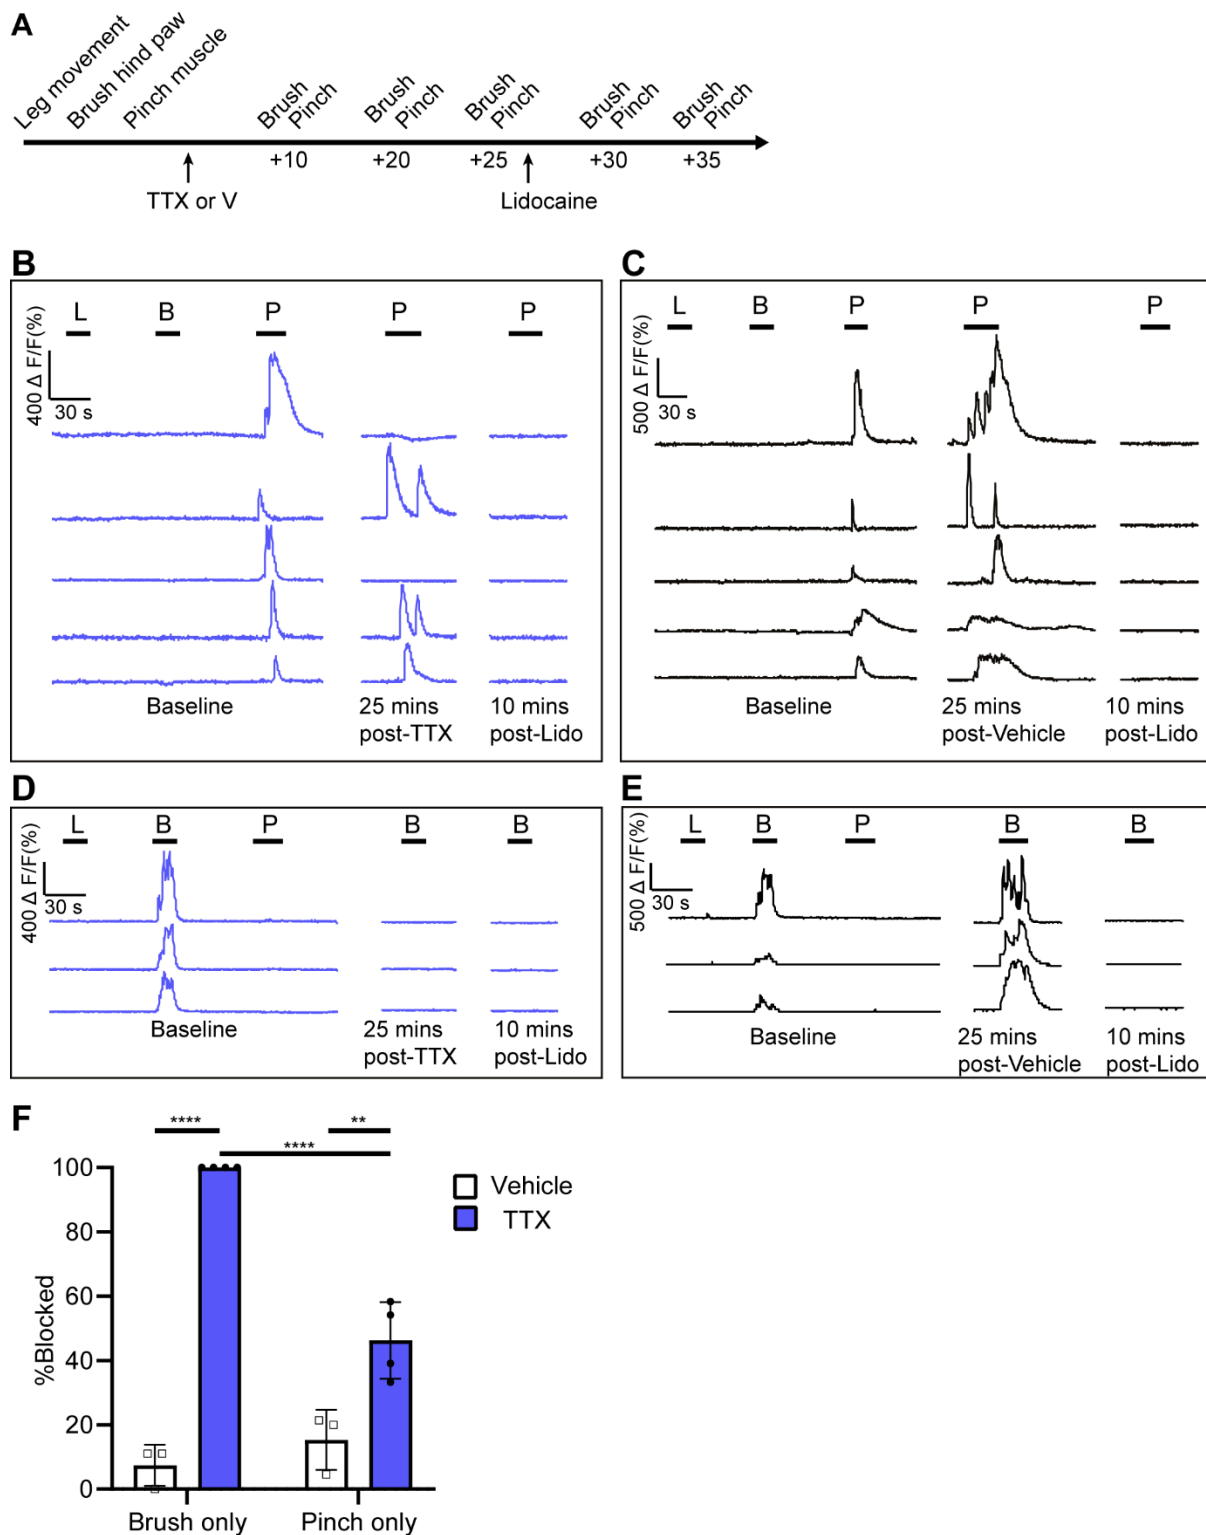

702

703 **Figure 2. Axonal TTX application blocks propagation in all brush responsive hind paw neurons but**  
 704 **only 46% of pinch responsive small to medium sized muscle afferents.** Experimental schematic is  
 705 shown in (A). Example calcium traces are presented in (B-D). Traces are shown for pinch responsive  
 706 small to medium neurons (B,C) or brush responsive hind paw neurons (D,E) before and after TTX  
 707 (B,D - blue) and Vehicle (C,E - black) application to the nerve. Note that only neurons responding at  
 708 baseline to just muscle pinch or just brush that were blocked by lidocaine were analysed. The bar

709 graph shows the average proportion of neurons blocked after 25 mins of drug application for each  
710 group (F). Between 6-28 brush and 12-30 pinch neurons were sampled between animals. Horizontal  
711 bars represent stimulation periods. L – leg movement, B brush of plantar surface of hind paw, P –  
712 pinch of exposed muscle belly. Bar graphs represent mean. 2-way ANOVA \*\*  $p < 0.01$ , \*\*\*\*  $p < 0.0001$   
713 vs control Sidak's post hoc. See also Movie 1.



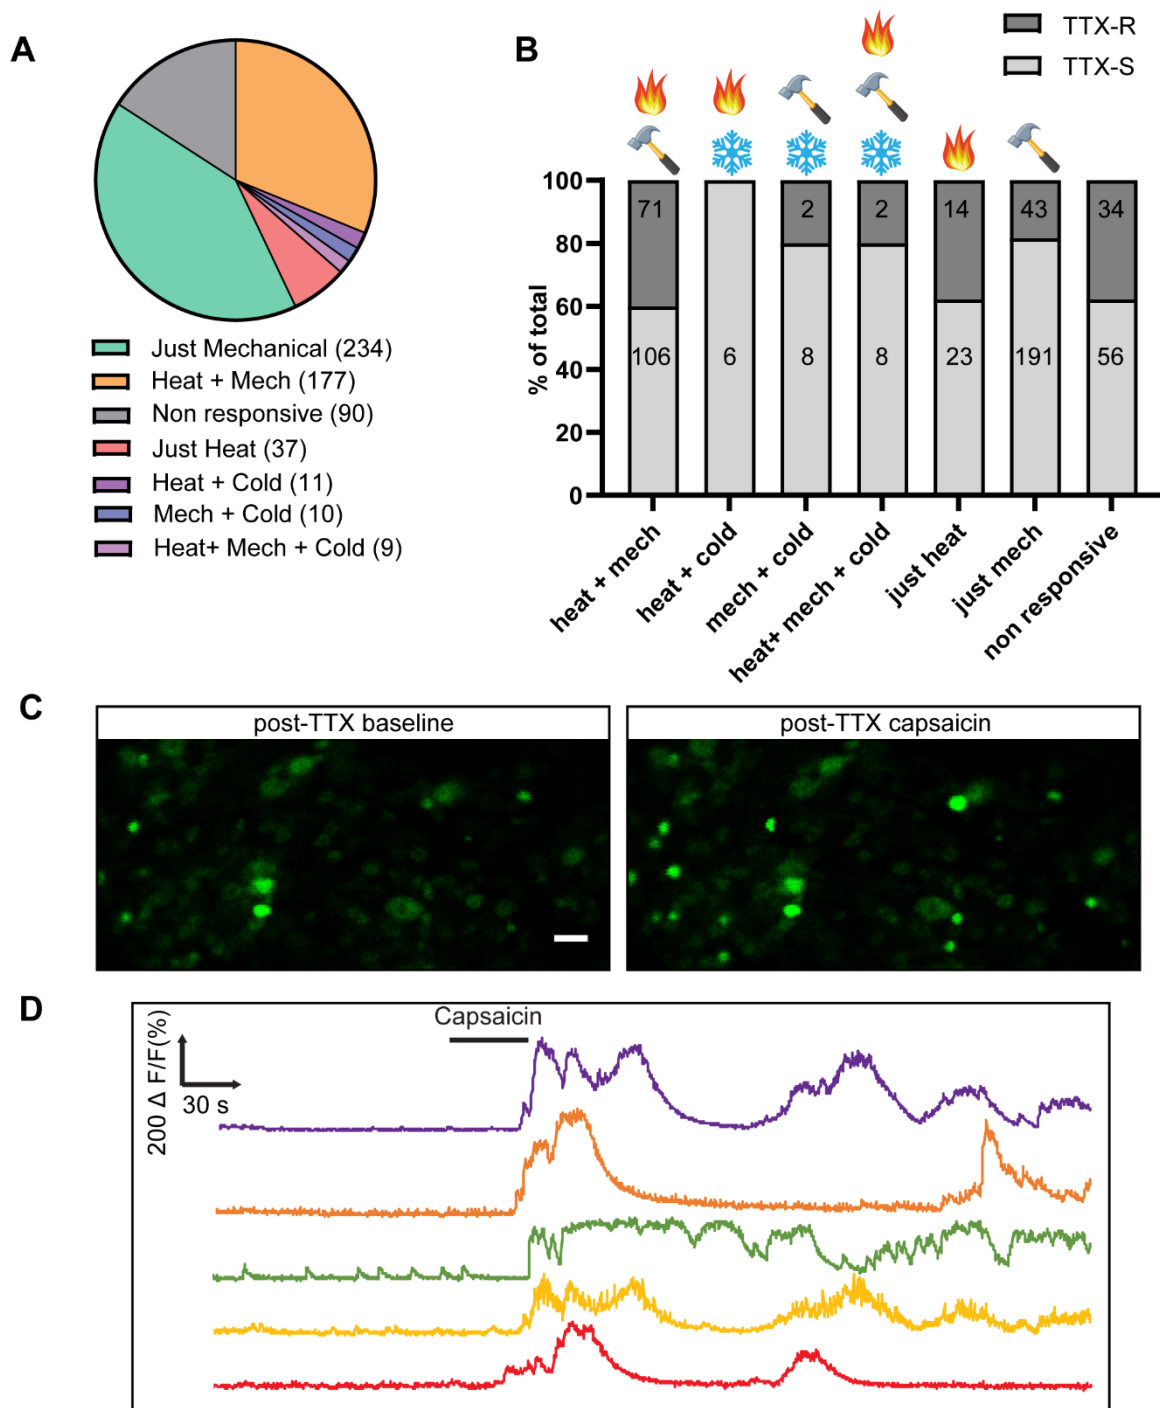

714

715 **Figure 3. Small to medium sized neurons resistant to axonal TTX are comprised of polymodal and**  
 716 **unimodal nociceptors and many are capsaicin sensitive.** Pie chart represents electrical responding  
 717 small to medium sized neurons grouped according to their responses to different stimuli (A). Within  
 718 each of these neuron groups, the neurons blocked by TTX (TTX-S), or not blocked by TTX (TTX-R) are  
 719 expressed as a percentage of the total number of neurons within each group (B). 66-136 small to  
 720 medium sized neurons pooled from n = 6 mice. A proportion of neurons responded to capsaicin  
 721 following TTX application (C&D). Example images of L4 DRG cell bodies from in-vivo GCaMP6s time  
 722 lapse recordings (C). Frames were extracted after 1 $\mu$ M TTX application before and 90s after  
 723 application of capsaicin. Example calcium traces are shown in (D). Example Images were taken at 10x  
 724 magnification, scalebar = 50  $\mu$ m. See also Movie 2.

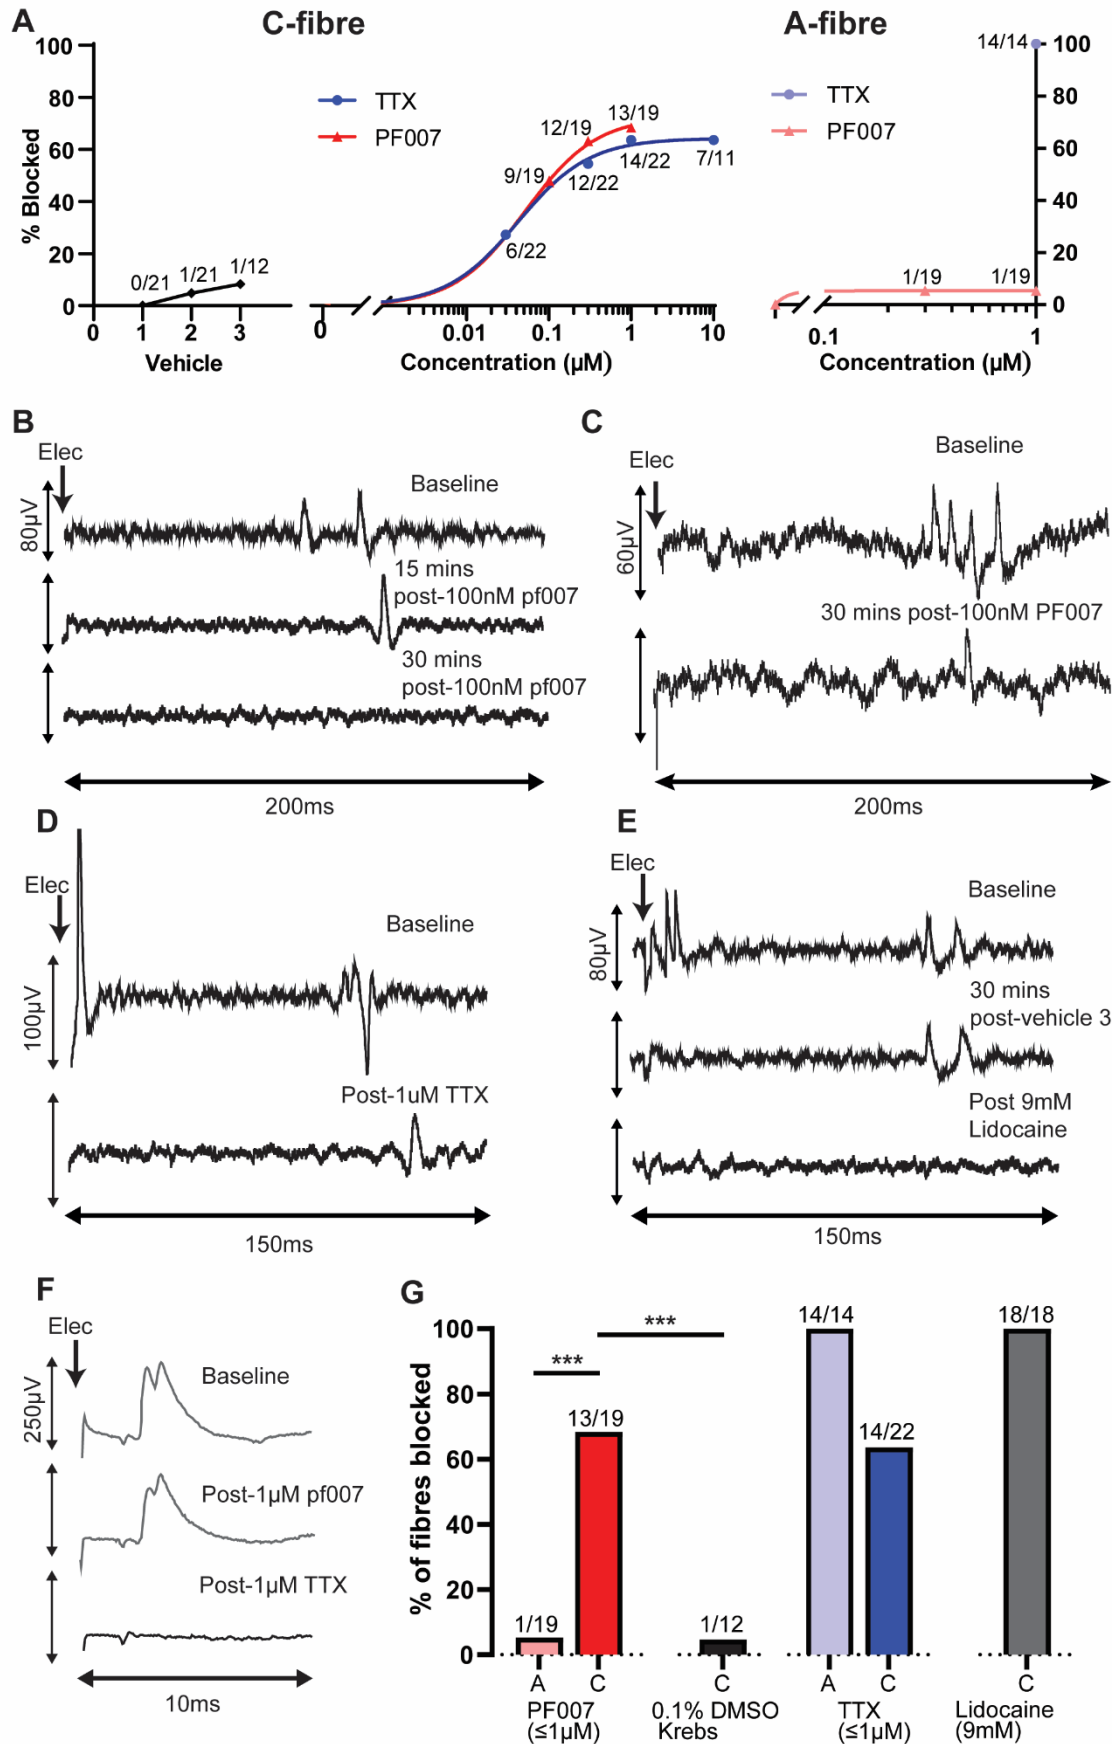

725

726

727

**Figure 4. Topical application of PF007 blocked conduction in 2/3rds of C-fibre sensory neurons.** 2/3<sup>ds</sup> of C-fibre sensory neurons were blocked following topical application of PF007 or TTX (A –

728 middle panel, B, C & D), but not following vehicle (A-left panel, E). A-fibre neurons were not blocked  
729 by PF007 but were blocked subsequently by application of TTX (A – right panel, F). Example traces of  
730 C-fibre (B-E) and A-fibre (F) neurons on electrical stimulation of the hind paw. Conduction slowing  
731 typically preceded block following application of PF007 (B & C) and TTX (D), whereas slowing was not  
732 apparent following vehicle application (E) or following PF007 application to A-fibre neurons (F). (G)  
733 Summary of electrophysiology data \*\*\*  $p < 0.001$  Fishers exact test. n=5-6 mice/group. Number of  
734 neurons in each group shown in (A). Note that the final application of vehicle was not possible in n=2  
735 mice due to technical issues.

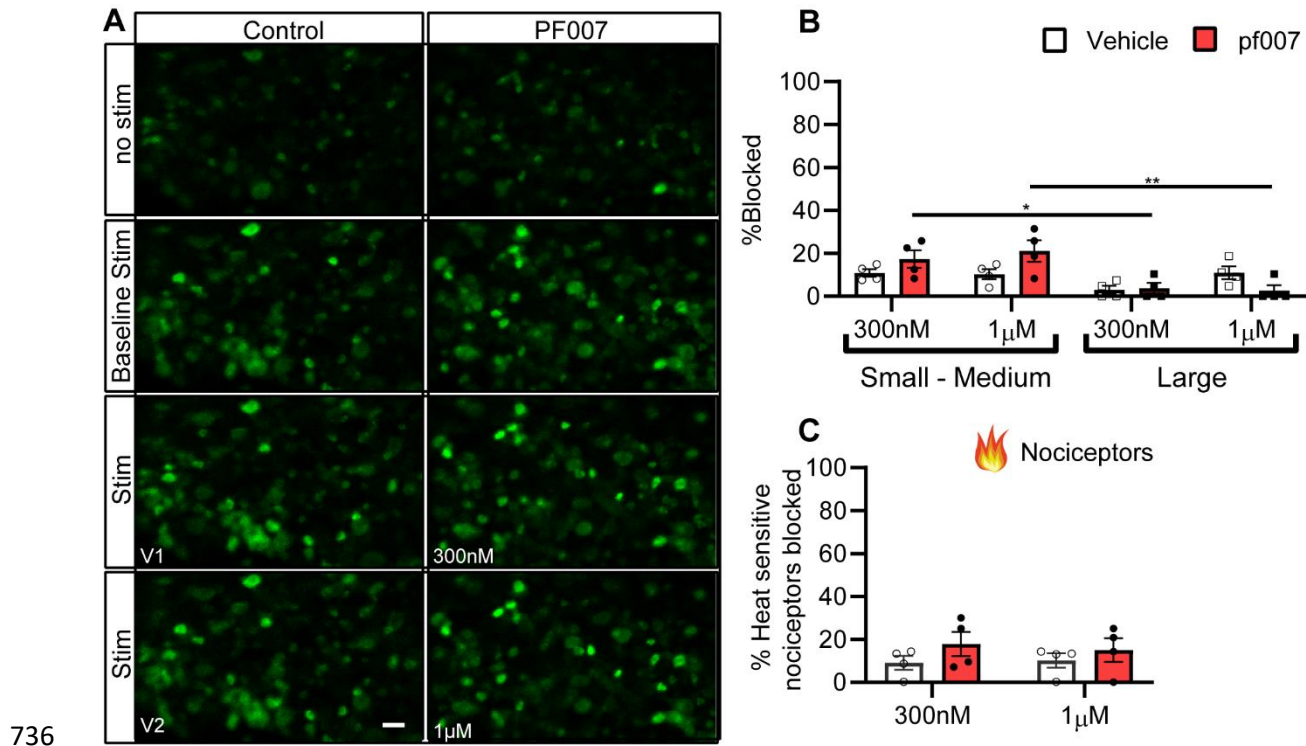

737 **Figure 5. Axonal PF007 application had minimal effects on propagation when assessed in mice via**  
738 **GCaMP6s in vivo imaging.** Example images of L4 DRG cell bodies from in-vivo GCaMP6s time lapse  
739 recordings (A). Frames were extracted at baseline and at the peak of electrical stimulation at  
740 baseline and following each drug dose. The bar graphs show the proportion of neurons blocked  
741 following drug application between stimulating and recording site when neurons are grouped by size  
742 (B) and for neurons responding to noxious heat stimulation of the terminal (C). Each point  
743 represents the proportion of neurons blocked in an individual animal. Between 31-124 small to  
744 medium, 6-29 large neurons and 14-27 heat responsive neurons were sampled between animals.  
745 The electrically induced response was blocked in few neurons after topical application of PF007 to  
746 the sciatic nerve (A- right panel, B & C). Note that these data were collected at the same time as the  
747 TTX data in Fig.1 – the vehicle control results are therefore identical. Bar graphs represent mean  $\pm$   
748 SEM. Scale bar = 50µM. 10x magnification. 3-way ANOVA for B) and RM 2-way ANOVA for C). \*\*  
749  $p < 0.01$  vs control Sidak's post hoc test.

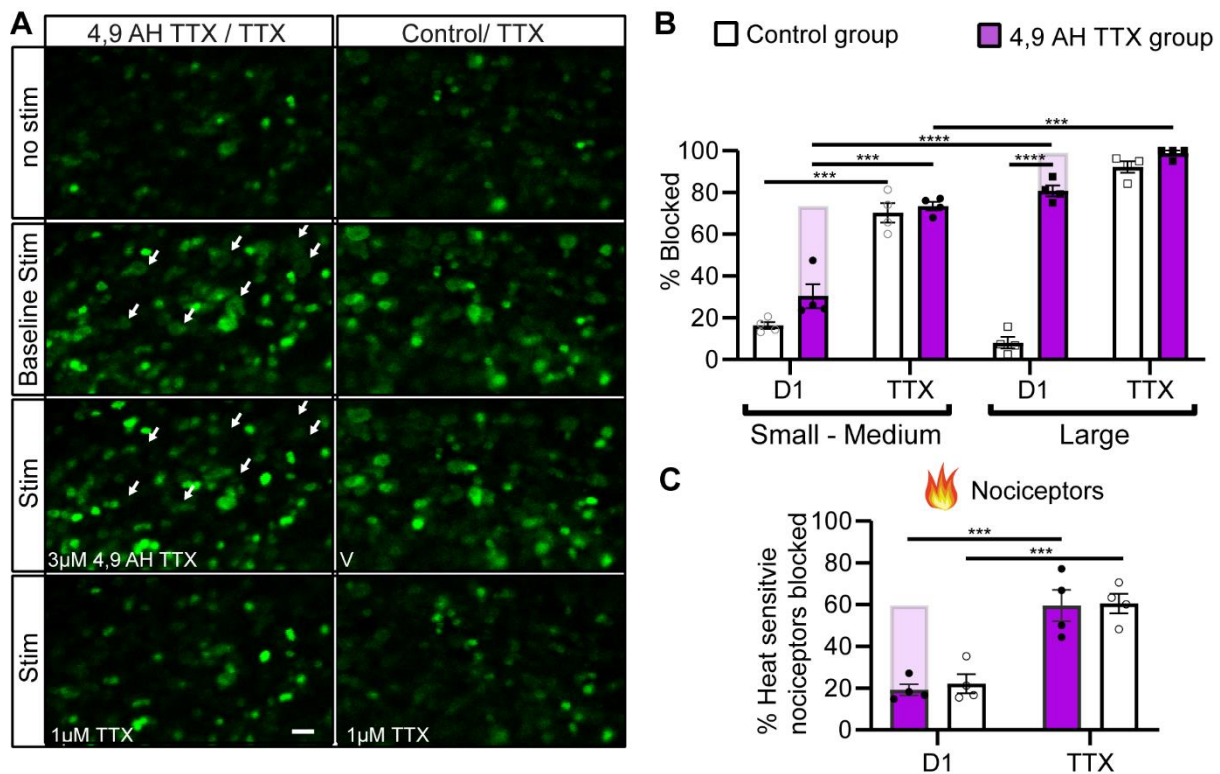

750  
 751 **Figure 6. Axonal 4,9 AH TTX application blocked propagation in most large sized neurons but few**  
 752 **small to medium sized neurons and very few nociceptors.** Example images of L4 DRG cell bodies  
 753 from in-vivo GCaMP6s time lapse recordings (A). Frames were extracted at baseline and at the peak  
 754 of electrical stimulation at baseline and following each drug dose. Note that nearly all large sized  
 755 neurons (indicated by white arrows in the left panel) were blocked by 3  $\mu$ M 4,9 AH TTX, whilst many  
 756 small to medium fibres are still conducting. The bar graphs show the proportion of neurons blocked  
 757 following drug application between stimulating and recording site when neurons are grouped by size  
 758 (B) and for neurons responding to noxious heat stimulation of the terminal (C). Each point  
 759 represents the proportion of neurons blocked in an individual animal. Between 46-144 small to  
 760 medium, 15-40 large neurons and 17-52 heat responsive neurons were sampled between animals.  
 761 The shaded bars represent the proportion of neurons blocked following addition of 1  $\mu$ M TTX. D1-  
 762 drug 1 (either 4,9 AH TTX or Vehicle). Bar graphs represent mean  $\pm$  SEM. Scale bar = 50 $\mu$ M. 10x  
 763 magnification. 3-way ANOVA for B) and RM 2-way ANOVA for C). \*\*  $p < 0.01$ , \*\*\*  $p < 0.001$ , \*\*\*\*  
 764  $p < 0.0001$  vs control Sidak's post hoc test. See also Movie 3.

|                                               | A-fibre      | C-fibre           |             |             |
|-----------------------------------------------|--------------|-------------------|-------------|-------------|
|                                               | PF007/TTX    | Vehicle/Lidocaine | PF007       | TTX         |
| CV (m/s), median (IQR)                        | 21.72 (6.27) | 0.54 (0.09)       | 0.52 (0.10) | 0.55 (0.08) |
| No. of neurons (mice)                         | 19 (5)       | 21 (6)            | 19 (6)      | 22 (6)      |
| No. of mechanical receptive fields identified | 13           | 12                | 11          | 12          |

765 **Table 1. Properties of A- and C-fibre neurons identified in experiments.**
